# Supplementary material
Source: PubMed Central journal article supplement (PMC5546035)
Supplement: 10.1074_M116.771493_jbc.M116.771493-2.pdf [file 10.1074_M116.771493_jbc.M116.771493-2.pdf]

Supplemental Figure Legends:  
Figure. S1

A

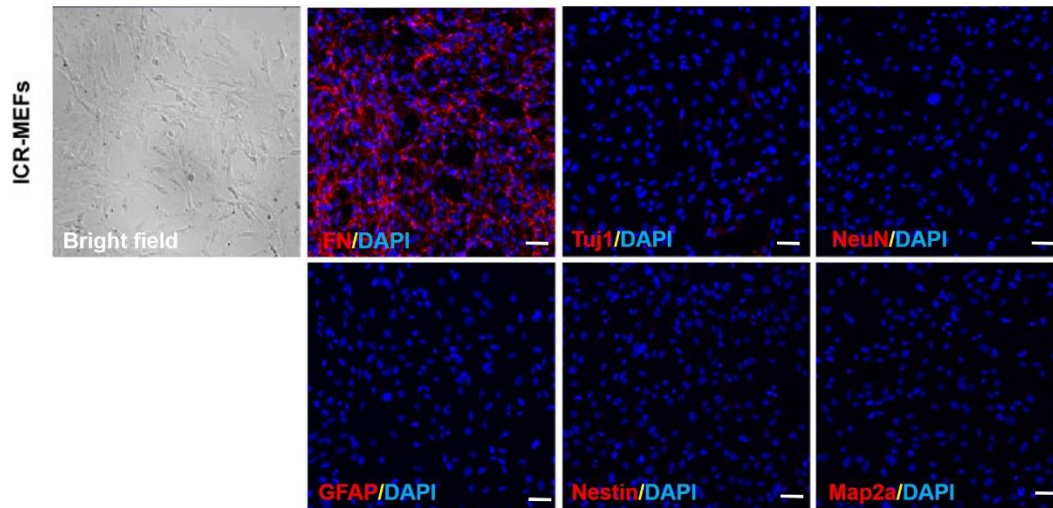

B

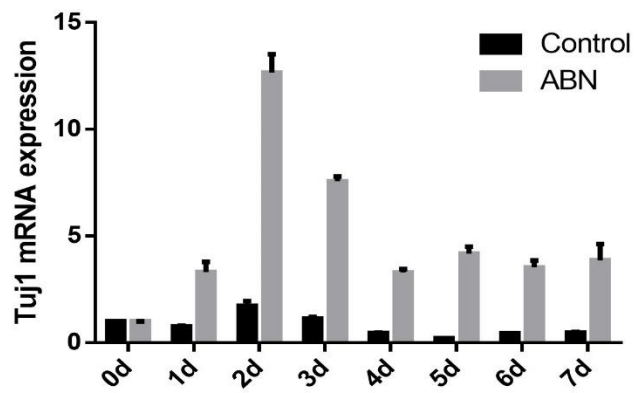

**FIGURE S1.** (A) Immunofluorescence staining to identify MEFs. (B) Quantitative real-time PCR analysis of *Tuj1* expression during ABN-induced transdifferentiation. The experiments were repeated 3 times.

Figure. S2

A

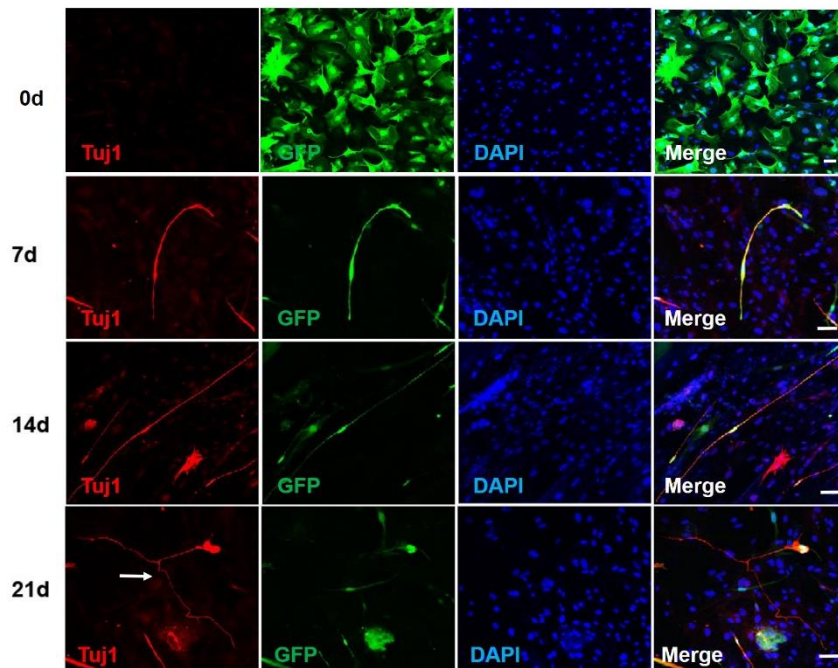

B

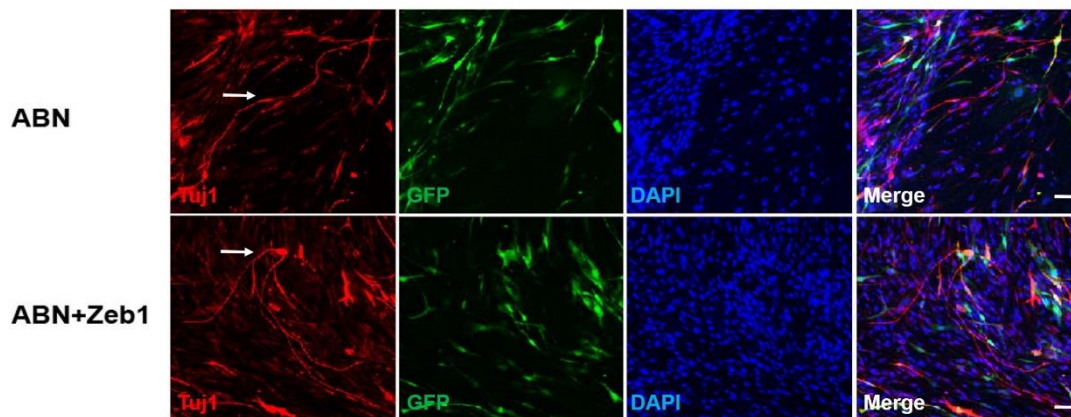

**FIGURE S2.** (A) Immunostaining of TUJ1 on days 7, 14 and 21 of transdifferentiation (ABN + *Zeb1* group). Scale bar, 50  $\mu$ m. (B) Immunostaining of multipolar iN cells at 21-days post-infection. Scale bar, 50  $\mu$ m.

Figure. S3

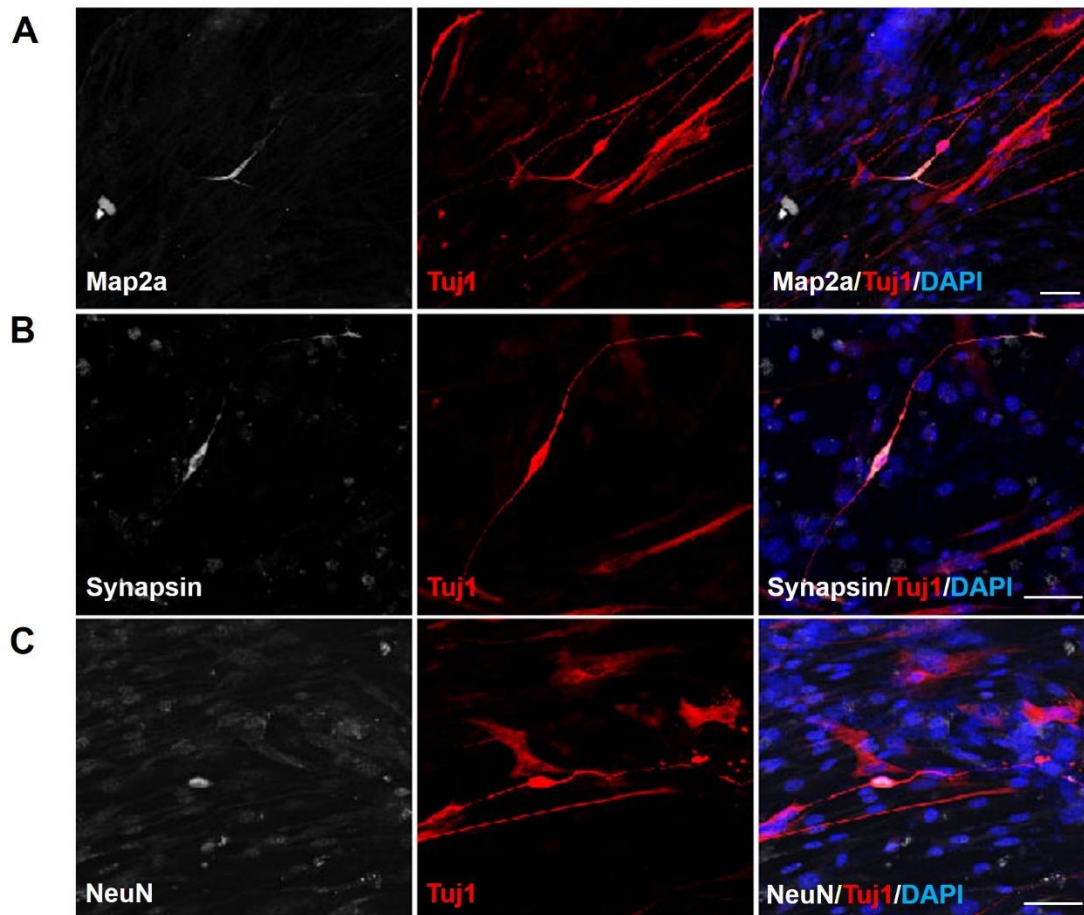

**FIGURE S3.** Characterization of mature iN cells by neuronal markers. (A-C) Immunostaining analysis one week post-infection using the indicated antibodies. *Map2a*, *Synapsin* and *NeuN*, pan-neuronal markers. Scale bar, 50  $\mu$ m.



Figure. S4

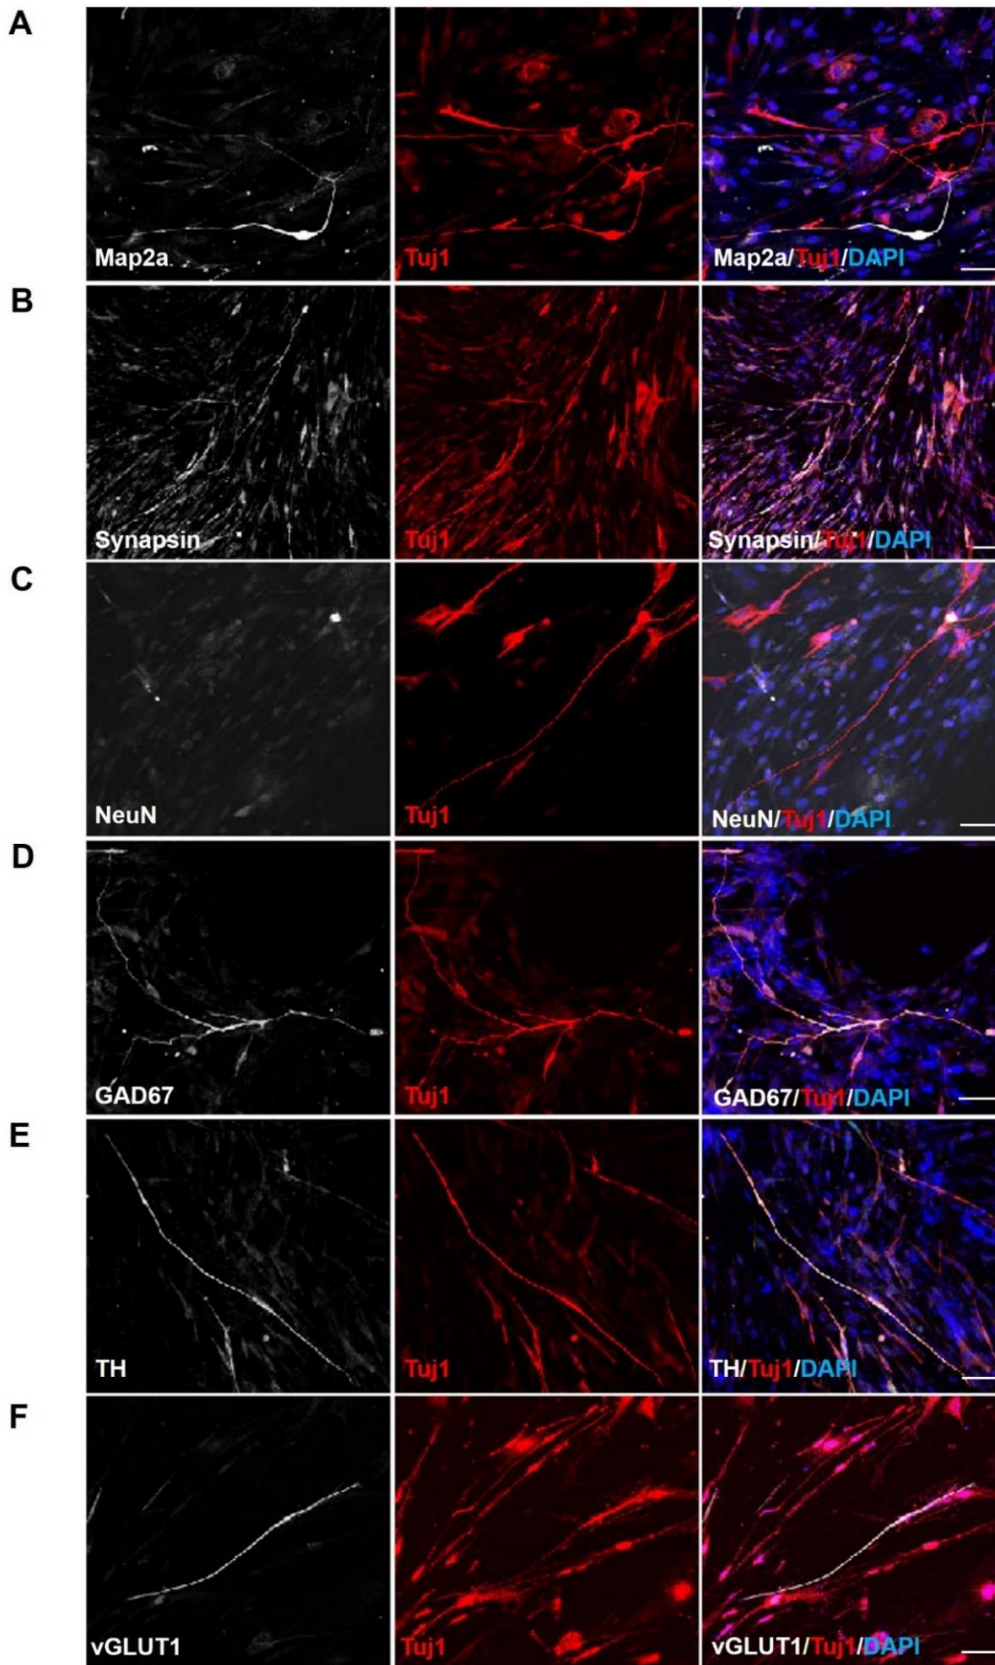

**FIGURE S4.** Characterization of mature iN cells by neuronal markers. (A-F) Immunostaining analysis three weeks post-infection using the indicated antibodies. *Map2a*, *Synapsin* and *NeuN*, pan-neuronal markers. *GAD67*, inhibitory neuron marker; Tyrosine hydroxylase (*TH*), dopaminergic neuron marker; *vGLUT1*, excitatory neuron marker. Scale bar, 50  $\mu$ m.

**Figure. S5**

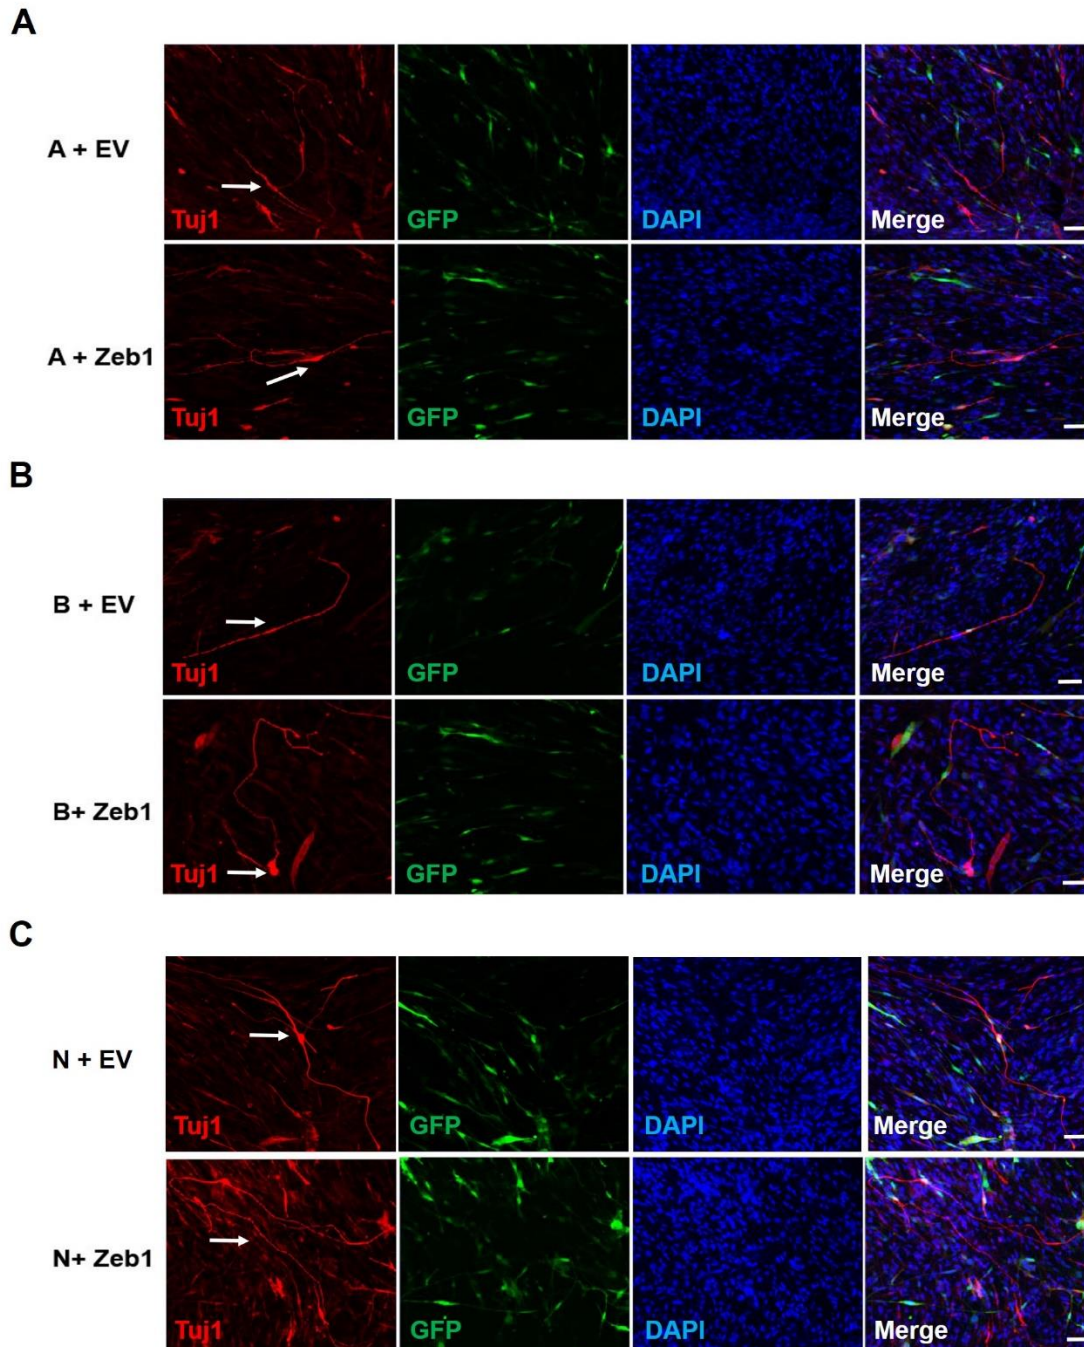

**FIGURE S5.** Bipolar iN cells generated by single transcription factors with or without *Zeb1*. (A-C) Immunofluorescence staining of TUJ1 in the indicated groups. Scale bars, 50  $\mu$ m.

Figure. S6

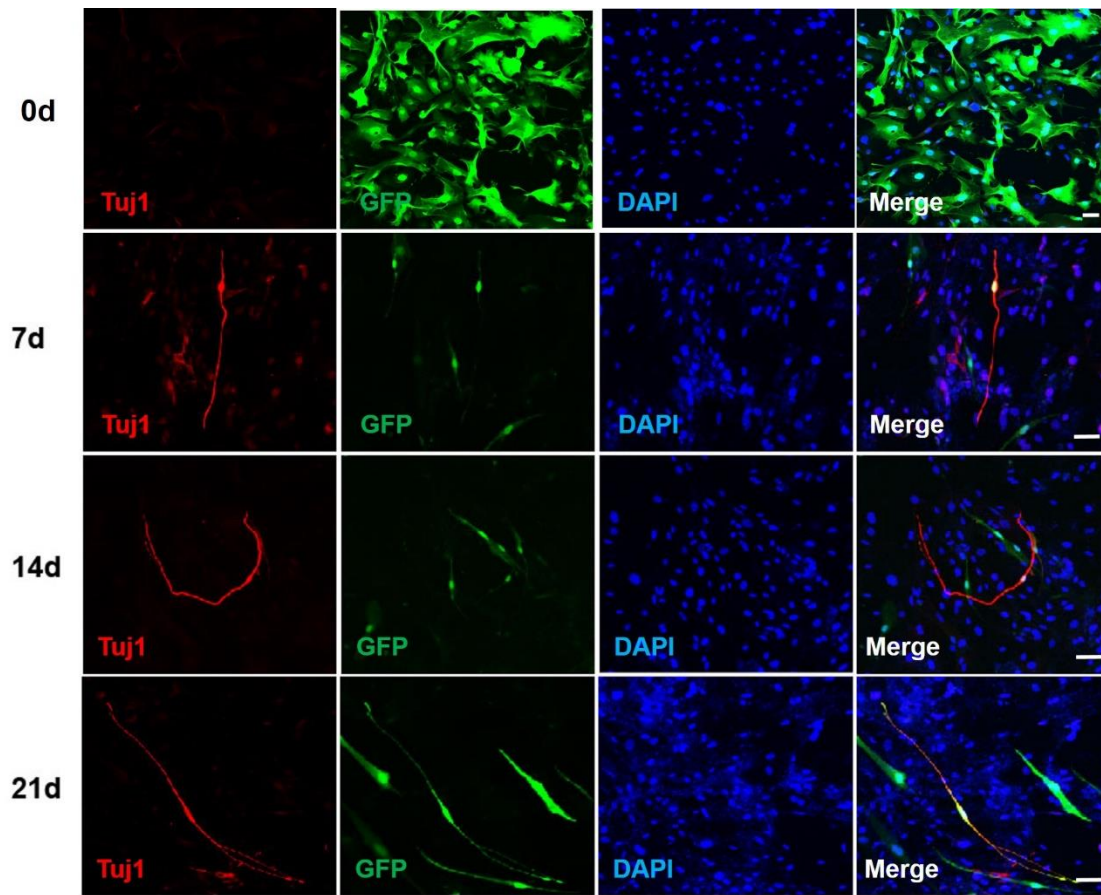

**FIGURE S6.** Immunofluorescence staining of TUJ1 on days 7, 14 and 21 of transdifferentiation with *Zeb1* alone. Scale bar, 50  $\mu$ m.



Figure. S7

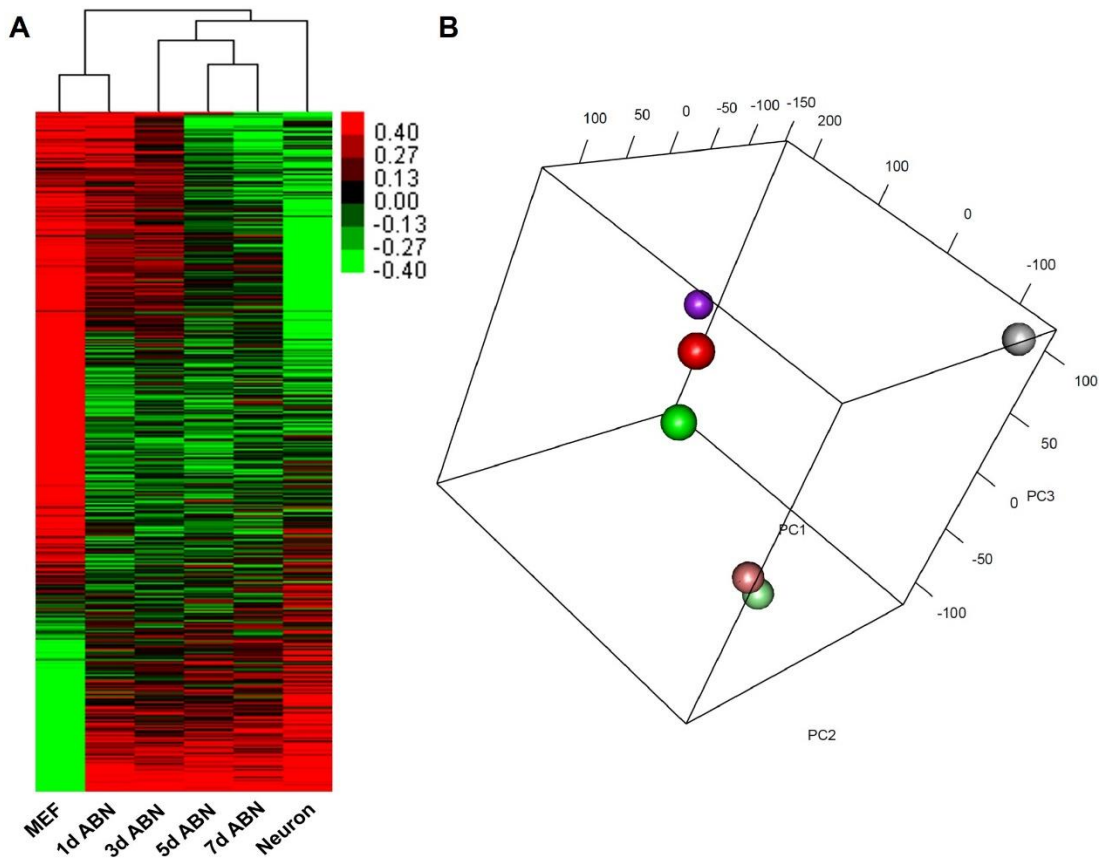

**FIGURE S7.** (A) Hierarchical clustering analysis of the whole-genome profiles of ABN groups. Primary neurons were isolated from the hippocampus of a newborn pup. iN cells were harvested at the indicated time points. (B) Principle component analysis (PCA) of the indicated samples. Light green, 2d ABN; Light red, 2d ABN + *Zeb1*; Green, 7d ABN; Red, 7d ABN + *Zeb1*; Gray, MEF; Purple, Neuron;

Figure S8

A

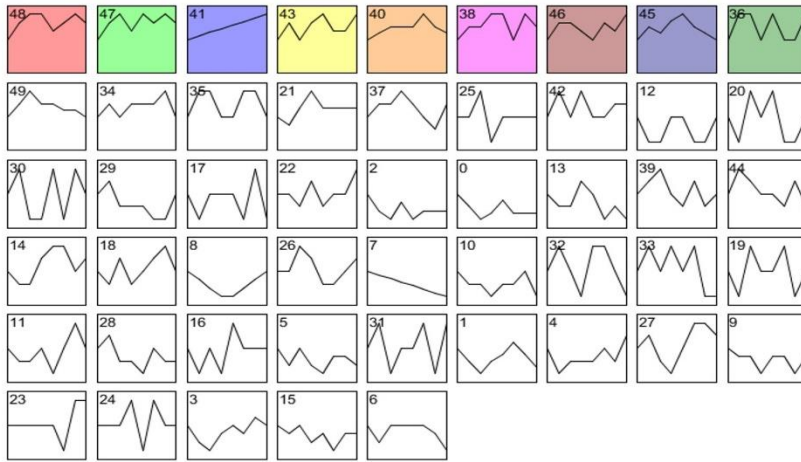

B

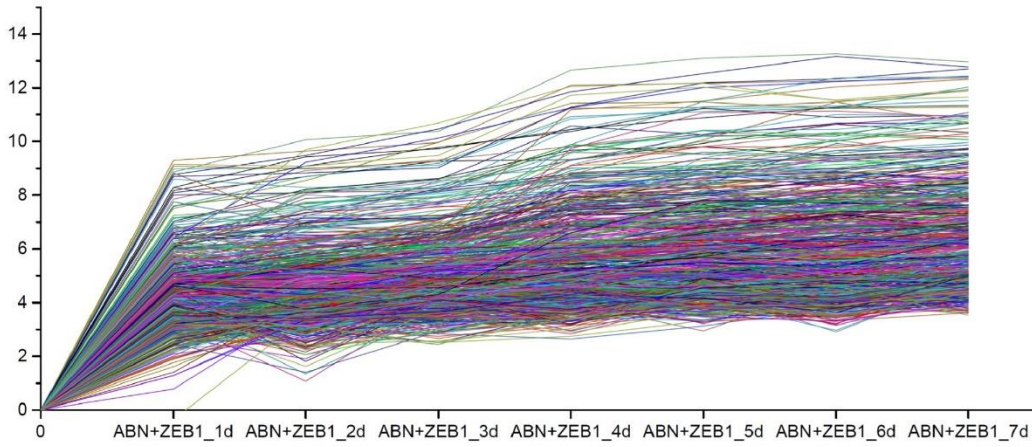

C

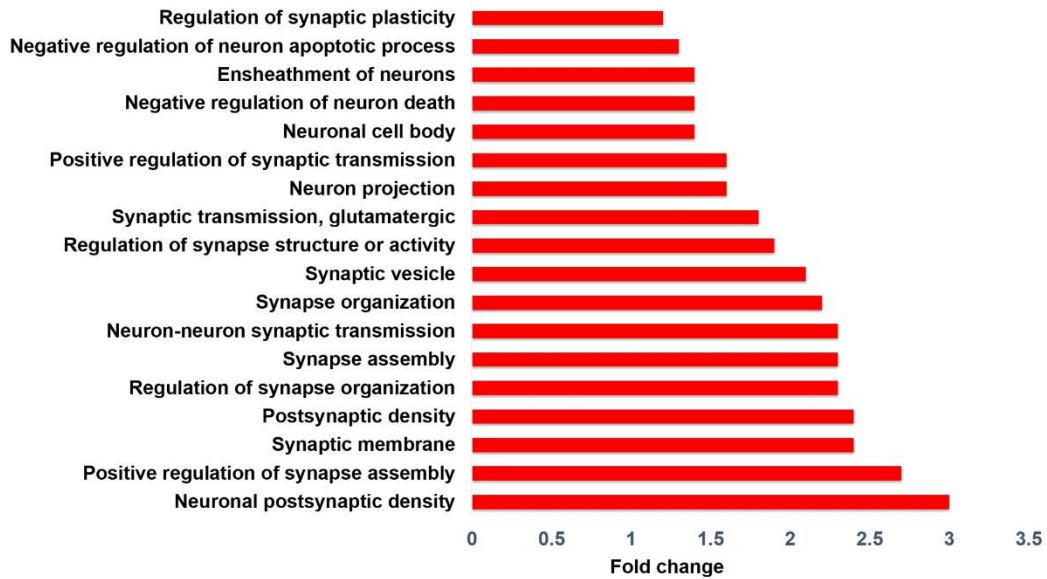



**FIGURE S8.** Short Time-series Expression Miner (STEM) analysis. (A) Selected STEM profiles. The colored squares indicate significance. (B) Profile 41 (0, 1, 2, 3, 4, 5, 6, 7); 710 genes assigned; 42.3 genes expected;  $P$  value = 0.00 (significant). (C) Gene ontology analysis of the 710 up-regulated genes.
